# Supplementary material for: Bipolar magnetism in a two-dimensional NbS2 semiconductor with high Curie temperature
Source: Royal Society of Chemistry journal article supplement (doi:10.1039/c8tc04188a), 2018-01-01
Supplement: c8tc04188a1.pdf [file c8tc04188a1.pdf]

## Electronic Supporting Information

# Bipolar magnetism in two-dimensional NbS<sub>2</sub> semiconductor with high Curie temperature

Yingjie Sun,<sup>a,b</sup> Zhiwen Zhuo,<sup>b</sup> and Xiaojun Wu<sup>b,\*</sup>

- a School of Science, Hebei University of Science and Technology, Shijiazhuang, Hebei 050018, China.
- b Hefei National Laboratory of Physical Sciences at the Microscale, Synergetic Innovation of Quantum Information & Quantum Technology, School of Chemistry and Materials Sciences, and CAS Key Laboratory of Materials for Energy Conversion, University of Science and Technology of China, Hefei, Anhui 230026, China.

□ [xjwu@ustc.edu.cn](mailto:xjwu@ustc.edu.cn) (X.J. Wu)

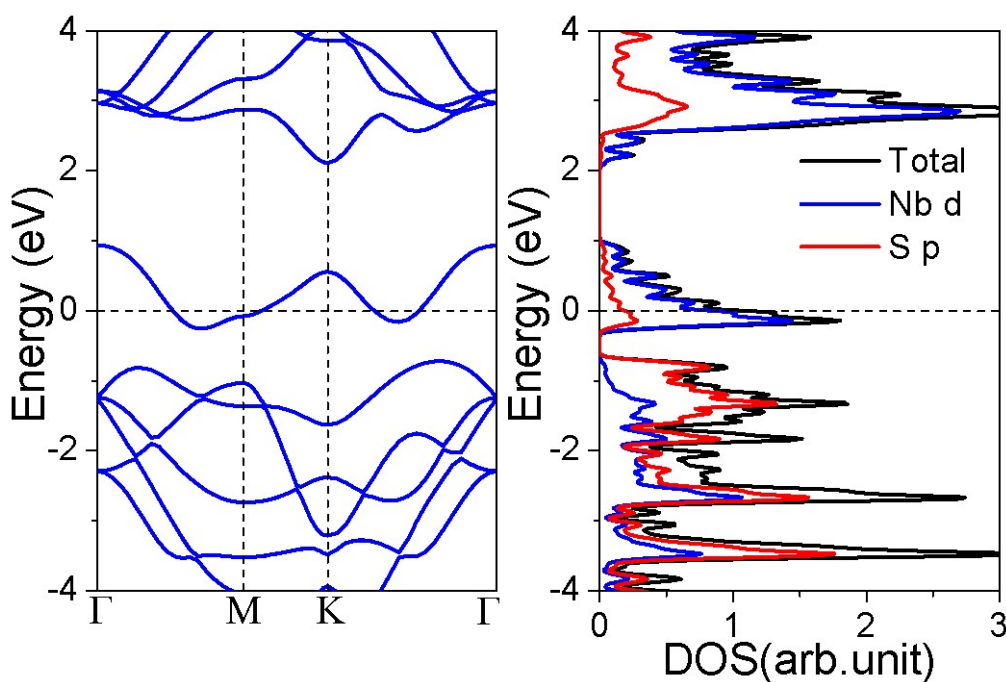

Fig. S1 Electronic structure calculated for NbS<sub>2</sub> monolayer at the PBE level.

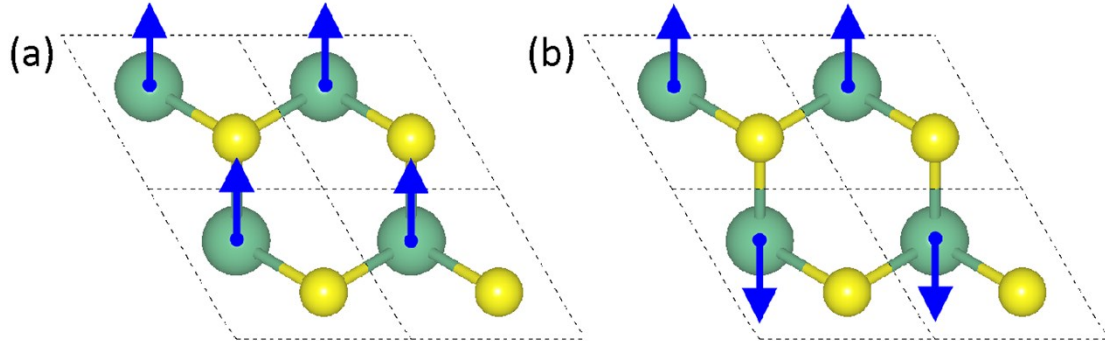

**Fig. S2** Magnetic orders in NbS<sub>2</sub> monolayer (a) Ferromagnetic (FM). (b) antiferromagnetic (AFM)

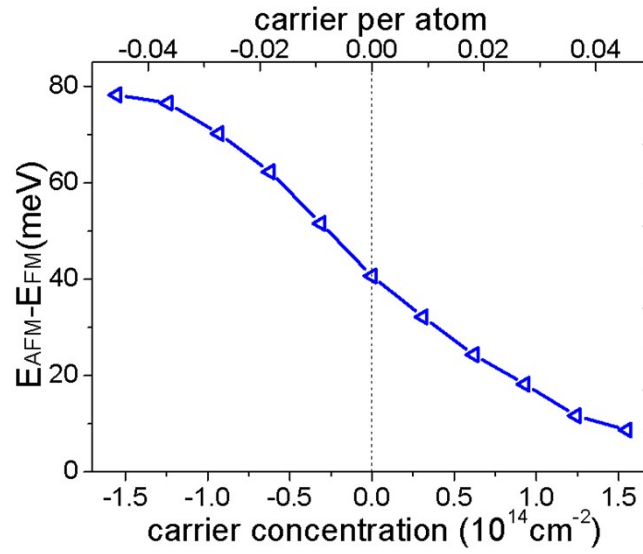

**Fig. S3** Relative energy of AFM and FM states under the variation of carrier concentration for 2D NbS<sub>2</sub> nanosheet. The positive and negative values are for electron and hole doping, respectively.

**Table S1** The optimized lattice constant ( $a$  in unit of Å), S-S bond length ( $d_{\text{S-S}}$  in unit of Å) and Nb-S bond length ( $d_{\text{Nb-S}}$  in unit of Å), local magnetic moment on per Nb atom ( $M$ , in unit of  $\mu\text{B}$ ), and energy difference between FM and AFM states ( $\Delta E$ , in unit of meV) are summarized.

| Strain (%)            | -9    | -5    | 0     | 5     | 10    |
|-----------------------|-------|-------|-------|-------|-------|
| $a$ (Å)               | 3.041 | 3.175 | 3.342 | 3.509 | 3.676 |
| $d_{\text{S-S}}$ (Å)  | 3.32  | 3.23  | 3.12  | 3.04  | 2.96  |
| $d_{\text{Nb-S}}$ (Å) | 2.42  | 2.44  | 2.48  | 2.53  | 2.59  |
| $M$ ( $\mu\text{B}$ ) | 0.72  | 0.76  | 0.80  | 0.84  | 0.88  |
| $\Delta E$ (meV)      | 13.1  | 32.0  | 40.7  | 51.8  | 78.5  |

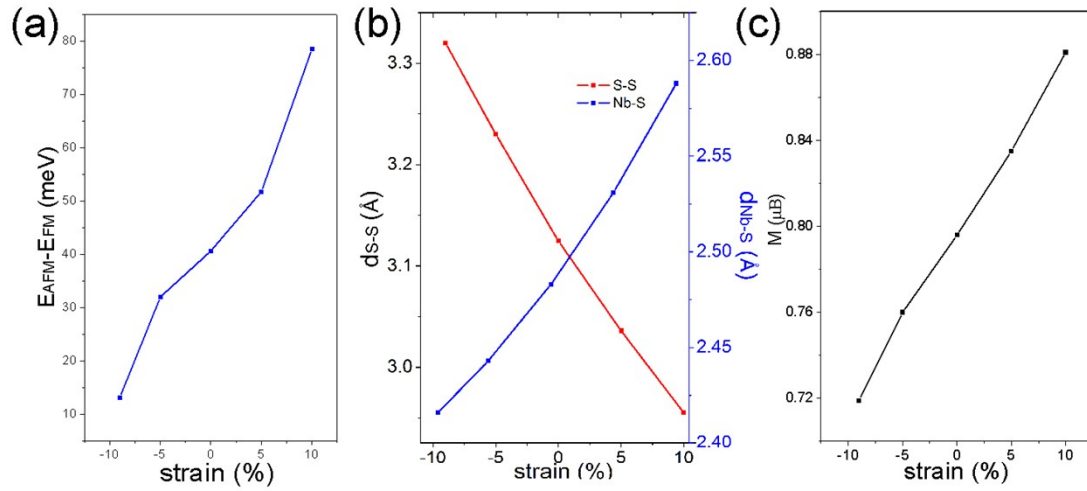

**Fig. S4** Biaxial strain dependence of (a) relative energy of AFM and FM states in the 2D NbS<sub>2</sub> crystal. (b) S-S bond length and Nb-S bond length, and (c) magnetic moment on per Nb atoms.

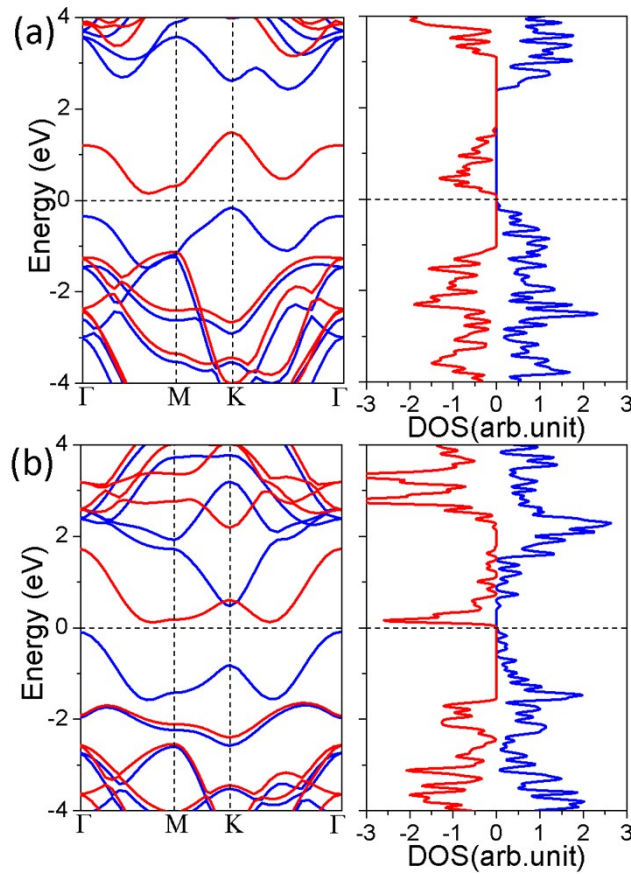

**Fig. S5** Band structure, total and partial DOS for (a) -5% and (b) 5% 2D NbS<sub>2</sub>. The Fermi levels are all set to zero.

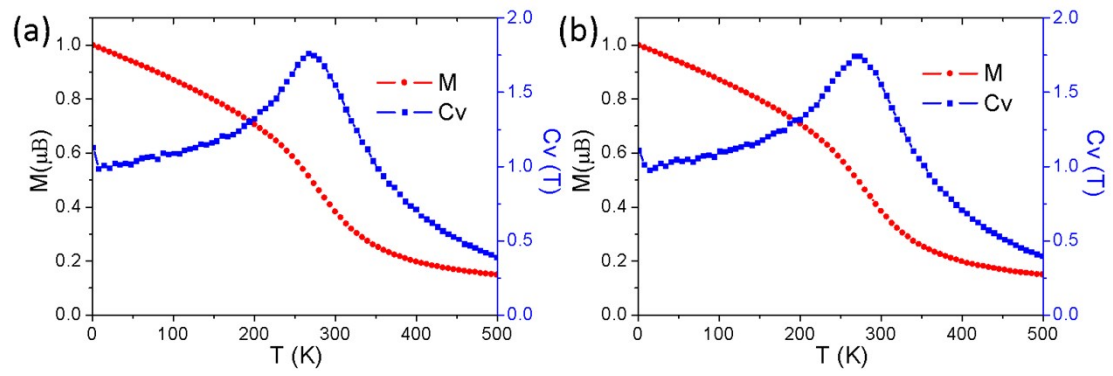

**Fig. S6** The simulated magnetic moment (M) and specific heat (C<sub>v</sub>) with respect to temperature for (a) hole doping with the carrier concentration of  $1.55 \times 10^{14} \text{ cm}^{-2}$ , and (b) a tensile strain of 10%.
